# Supplementary material
Source: PubMed Central journal article supplement (PMC5333187)
Supplement: ma6b02643_si_001.pdf [file ma6b02643_si_001.pdf]

## Supporting Information for:

### Preparation and Cross-linking of All-Acrylamide Diblock Copolymer Nano-objects via Polymerization-Induced Self-Assembly in Aqueous Solution

*Sarah J. Byard, Mark Williams, Beulah E. McKenzie, Adam Blanz and Steven P. Armes\**

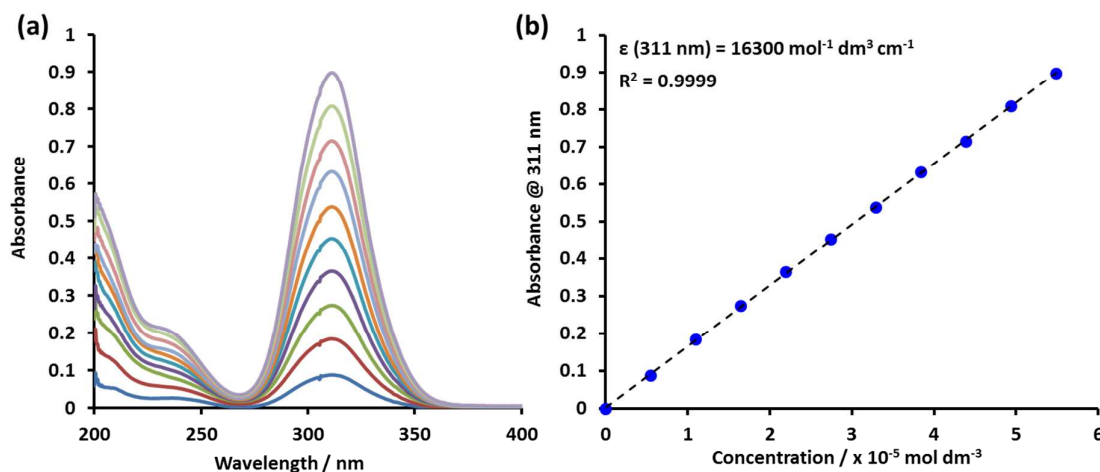

**Figure S1.** (a) UV/visible absorption spectra recorded for 2-(dodecylthiocarbonothioylthio)-2-methylpropionic acid (DDMAT) in methanol for DDMAT concentrations ranging from  $5.5 \mu\text{mol dm}^{-3}$  to  $54.9 \mu\text{mol dm}^{-3}$ . (b) Beer-Lambert calibration plot constructed for DDMAT in methanol to calculate the molar extinction coefficient ( $\epsilon$ ) of the absorption maximum at 311 nm.

[As pointed out by one reviewer of this manuscript, the molar extinction coefficients for the DDMAT CTA and the PDMAC-DDMAT macro-CTA may not necessarily be identical. However, in practice the wavelength maxima for these two species differ by only 2 nm (311 nm vs. 309 nm, respectively). This suggests that the corresponding molar extinction coefficients may be rather similar. To examine whether this was indeed the case, a relatively short PDMAC macro-CTA was prepared with a target DP of 15. For such low DPs, NMR spectroscopy is relatively accurate and hence can be compared to the mean DP obtained from UV spectroscopy. In both cases, the mean DP for the PDMAC-DDMAT macro-CTA was found to be 17. Thus any difference in molar extinction coefficients between the DDMAT CTA and the PDMAC-DDMAT macro-CTA is clearly negligible. Hence the mean DPs calculated using UV spectroscopy data that are reported in the main manuscript obtained for macro-CTAs with longer DPs are considered reliable.]

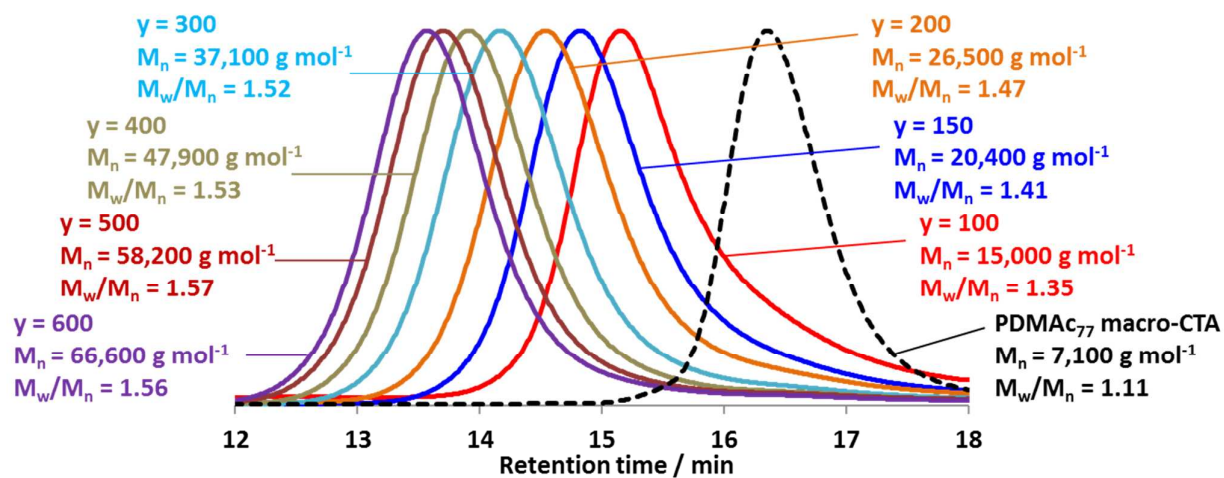

**Figure S2.** GPC chromatograms recorded using DMF eluent containing 10 mM LiBr with a refractive index detector for a series of PDMAc<sub>77</sub>-PDAAM<sub>y</sub> where  $y = 100$  to 600. Calibration against a series of ten near-monodisperse poly(methyl methacrylate) standards.

**Table S1.** Summary of the characterization data for all PDMA<sub>x</sub>-PDAAM<sub>y</sub> compositions.

| Entry | PDMA <sub>x</sub> DP | Target DAAM DP | Conv. % <sup>a</sup> | Actual DAAM DP | Theo. M <sub>n</sub> <sup>b</sup> | GPC M <sub>n</sub> <sup>c</sup> | M <sub>w</sub> /M <sub>n</sub> <sup>c</sup> | DLS Diameter / nm (PDI) <sup>d</sup> | Assigned morphology <sup>e</sup> |
|-------|----------------------|----------------|----------------------|----------------|-----------------------------------|---------------------------------|---------------------------------------------|--------------------------------------|----------------------------------|
| 1     | 40                   | 50             | 100                  | 50             | 12800                             | 8900                            | 1.13                                        | 144 (0.62)                           | S+W                              |
| 2     | 40                   | 70             | 100                  | 70             | 16200                             | 10800                           | 1.24                                        | 125 (0.56)                           | S+W                              |
| 3     | 40                   | 85             | 100                  | 85             | 18700                             | 12700                           | 1.20                                        | 352 (0.55)                           | S+W                              |
| 4     | 40                   | 90             | 100                  | 90             | 19600                             | 14800                           | 1.27                                        | -                                    | S+W                              |
| 5     | 40                   | 95             | 100                  | 95             | 20400                             | 14900                           | 1.25                                        | -                                    | S+W                              |
| 6     | 40                   | 100            | 99                   | 99             | 21100                             | 14000                           | 1.28                                        | 403 (0.45)                           | W                                |
| 7     | 40                   | 105            | 100                  | 105            | 22100                             | 16200                           | 1.26                                        | -                                    | W+V                              |
| 8     | 40                   | 110            | 100                  | 110            | 22900                             | 16900                           | 1.30                                        | -                                    | W+V                              |
| 9     | 40                   | 115            | 100                  | 115            | 23800                             | 17000                           | 1.30                                        | -                                    | W+V                              |
| 10    | 40                   | 120            | 100                  | 120            | 24600                             | 16300                           | 1.22                                        | 432 (0.27)                           | W+V                              |
| 11    | 40                   | 140            | 100                  | 140            | 28000                             | 18600                           | 1.20                                        | 467 (0.23)                           | V                                |
| 12    | 40                   | 150            | 100                  | 150            | 29700                             | 18200                           | 1.38                                        | 560 (0.25)                           | V                                |
| 13    | 40                   | 200            | 99                   | 198            | 37800                             | 23700                           | 1.43                                        | 559 (0.16)                           | V                                |
| 14    | 46                   | 54             | 100                  | 54             | 14000                             | 10600                           | 1.14                                        | 41 (0.23)                            | S+W                              |
| 15    | 46                   | 65             | 100                  | 65             | 15900                             | 11800                           | 1.15                                        | 49 (0.16)                            | S+W                              |
| 16    | 46                   | 76             | 100                  | 76             | 17800                             | 13000                           | 1.16                                        | 95 (0.19)                            | S+W                              |
| 17    | 46                   | 87             | 100                  | 87             | 19600                             | 14100                           | 1.27                                        | 127 (0.40)                           | S+W                              |
| 18    | 46                   | 98             | 100                  | 98             | 21500                             | 15200                           | 1.20                                        | 188 (0.37)                           | W+V                              |
| 19    | 46                   | 109            | 100                  | 109            | 23400                             | 16400                           | 1.20                                        | 168 (0.19)                           | W+V                              |
| 20    | 46                   | 131            | 100                  | 131            | 27000                             | 19100                           | 1.22                                        | 332 (0.20)                           | W+V                              |
| 21    | 46                   | 176            | 98                   | 172            | 34000                             | 23100                           | 1.27                                        | 452 (0.17)                           | V                                |
| 22    | 46                   | 218            | 99                   | 216            | 41500                             | 28900                           | 1.27                                        | 453 (0.16)                           | V                                |
| 23    | 58                   | 57             | 100                  | 57             | 15800                             | 9700                            | 1.27                                        | 31 (0.04)                            | S+W                              |
| 24    | 58                   | 69             | 100                  | 69             | 17800                             | 10900                           | 1.28                                        | 37 (0.05)                            | S+W                              |
| 25    | 58                   | 80             | 100                  | 80             | 19700                             | 12000                           | 1.30                                        | 48 (0.08)                            | S+W                              |
| 26    | 58                   | 92             | 99                   | 91             | 21500                             | 14600                           | 1.28                                        | 75 (0.16)                            | S+W                              |
| 27    | 58                   | 92             | 100                  | 92             | 21700                             | 13400                           | 1.33                                        | 49 (0.06)                            | S+W                              |
| 28    | 58                   | 103            | 100                  | 103            | 23500                             | 14500                           | 1.34                                        | 58 (0.09)                            | S+W                              |
| 29    | 58                   | 109            | 98                   | 107            | 24200                             | 17200                           | 1.22                                        | 95 (0.09)                            | W+V                              |
| 30    | 58                   | 126            | 100                  | 126            | 27400                             | 18700                           | 1.30                                        | 81 (0.09)                            | W+V                              |
| 31    | 58                   | 138            | 100                  | 138            | 29500                             | 20000                           | 1.29                                        | 96 (0.05)                            | W+V                              |
| 32    | 58                   | 144            | 99                   | 143            | 30300                             | 18000                           | 1.31                                        | 96 (0.08)                            | W+V                              |
| 33    | 58                   | 149            | 100                  | 149            | 31300                             | 21000                           | 1.30                                        | 117 (0.07)                           | V                                |
| 34    | 58                   | 161            | 100                  | 161            | 33400                             | 22200                           | 1.33                                        | 128 (0.08)                           | V                                |
| 35    | 58                   | 172            | 99                   | 170            | 34900                             | 23600                           | 1.39                                        | 397 (0.17)                           | V                                |
| 36    | 58                   | 172            | 100                  | 172            | 35200                             | 22200                           | 1.33                                        | 157 (0.11)                           | V                                |
| 37    | 58                   | 201            | 100                  | 201            | 40100                             | 24500                           | 1.38                                        | 279 (0.28)                           | V                                |
| 38    | 58                   | 207            | 100                  | 207            | 41100                             | 26300                           | 1.38                                        | 248 (0.19)                           | V                                |
| 39    | 58                   | 218            | 100                  | 218            | 43000                             | 27300                           | 1.37                                        | 337 (0.13)                           | V                                |
| 40    | 58                   | 230            | 98                   | 225            | 44200                             | 27100                           | 1.54                                        | 412 (0.11)                           | V                                |
| 41    | 58                   | 230            | 99                   | 228            | 44700                             | 25900                           | 1.37                                        | 360 (0.15)                           | V                                |
| 42    | 58                   | 230            | 100                  | 230            | 45000                             | 28500                           | 1.37                                        | 373 (0.13)                           | V                                |
| 43    | 58                   | 230            | 100                  | 230            | 45000                             | 31100                           | 1.39                                        | 402 (0.19)                           | V                                |
| 44    | 58                   | 345            | 99                   | 342            | 64000                             | 34600                           | 1.44                                        | 410 (0.12)                           | V                                |
| 45    | 68                   | 78             | 100                  | 78             | 20300                             | 14400                           | 1.21                                        | 40 (0.09)                            | S                                |
| 46    | 68                   | 104            | 100                  | 104            | 24700                             | 17400                           | 1.24                                        | 47 (0.08)                            | S                                |
| 47    | 68                   | 157            | 100                  | 157            | 33700                             | 23400                           | 1.32                                        | 53 (0.09)                            | S                                |
| 48    | 68                   | 209            | 99                   | 207            | 42100                             | 26300                           | 1.56                                        | 65 (0.05)                            | S                                |
| 49    | 68                   | 417            | 99                   | 413            | 80000                             | 46400                           | 1.68                                        | -                                    | S                                |
| 50    | 68                   | 626            | 99                   | 620            | 112000                            | 60300                           | 1.80                                        | 150 (0.03)                           | S                                |
| 51    | 77                   | 75             | 100                  | 75             | 20700                             | 14700                           | 1.21                                        | 38 (0.05)                            | S                                |
| 52    | 77                   | 100            | 100                  | 100            | 24900                             | 17400                           | 1.25                                        | 46 (0.14)                            | S                                |
| 53    | 77                   | 150            | 99                   | 149            | 33100                             | 20400                           | 1.41                                        | 53 (0.06)                            | S                                |
| 54    | 77                   | 200            | 99                   | 198            | 41500                             | 26500                           | 1.47                                        | 60 (0.05)                            | S                                |
| 55    | 77                   | 300            | 99                   | 297            | 58300                             | 37100                           | 1.52                                        | 75 (0.02)                            | S                                |
| 56    | 77                   | 400            | 99                   | 396            | 75000                             | 47900                           | 1.53                                        | 87 (0.03)                            | S                                |
| 57    | 77                   | 500            | 99                   | 495            | 91800                             | 58200                           | 1.57                                        | 100 (0.03)                           | S                                |
| 58    | 77                   | 600            | 98                   | 588            | 107500                            | 66600                           | 1.56                                        | 113 (0.03)                           | S                                |

<sup>a</sup> <sup>1</sup>H NMR spectroscopy in CD<sub>3</sub>OD, <sup>b</sup>  $M_{n,th} = (([DAAM]_0/[PDMA]_0) \times DAAM \text{ conv} \times M_{DAAM}) + M_{PDMA}$ , <sup>c</sup> Determined by DMF GPC vs. PMMA standards <sup>d</sup> Determined by dynamic light scattering on 0.1 % w/v dispersions in pH 2.5 water <sup>e</sup> Determined by TEM studies of 0.1 % w/v aqueous dispersions at pH 2.5. S = pure spheres, S+W = mixed phase of spherical micelles and worms, W = pure worms, W+V = mixed phase of worms and vesicles and V = pure vesicles.

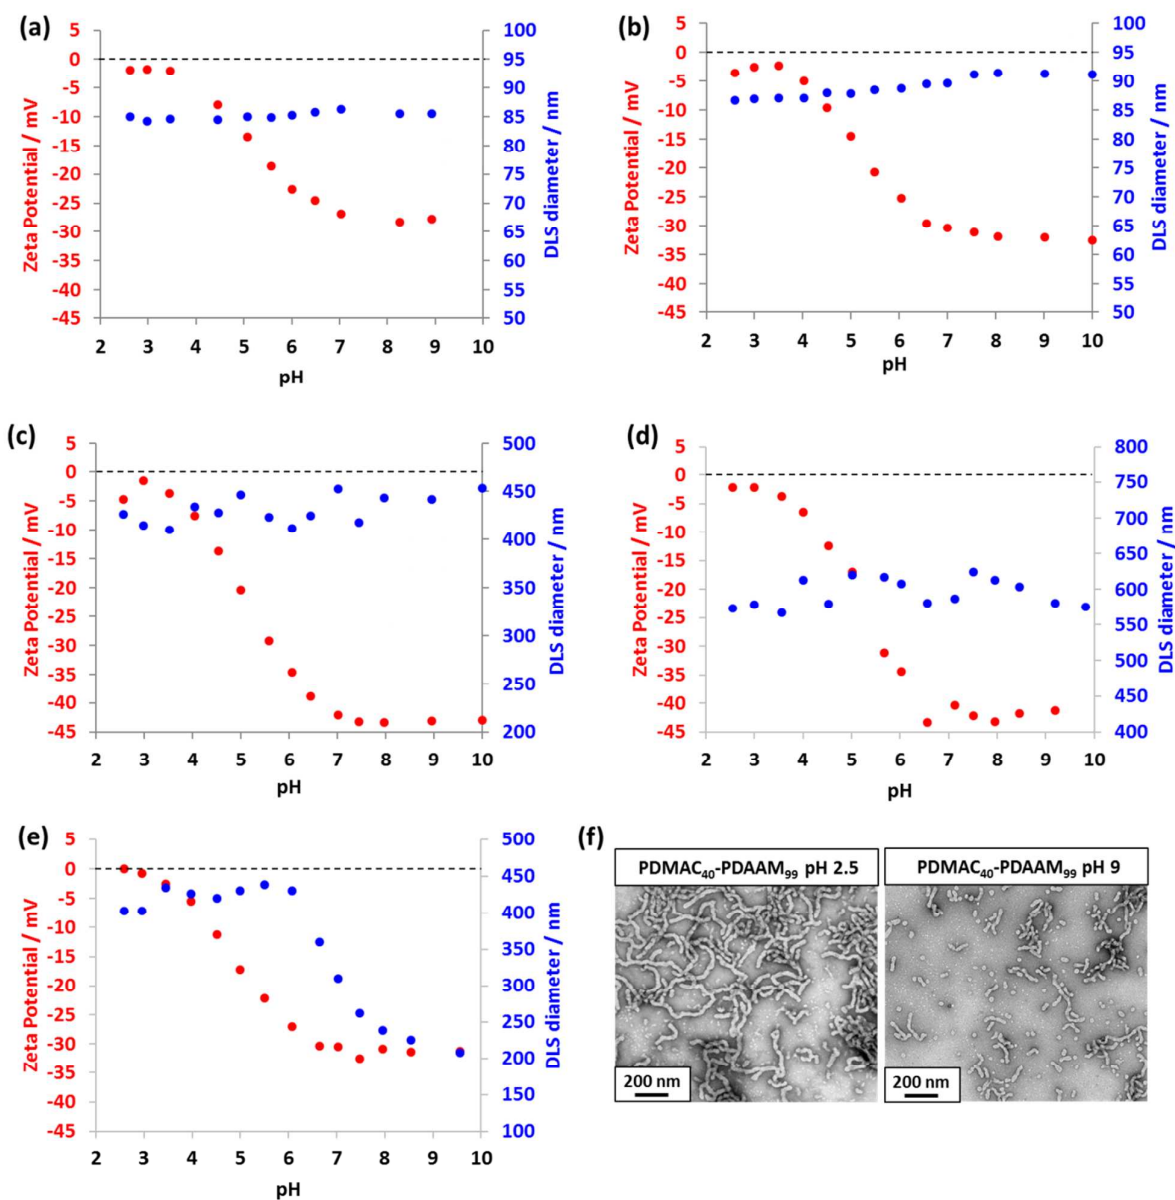

**Figure S3.** Variation of intensity-average hydrodynamic particle diameter (measured by DLS) and zeta potential with pH recorded at 25 °C for 0.1 % w/w aqueous dispersions of (a) a PDMAc<sub>58</sub>-PDAAm<sub>91</sub> worm/sphere mixed phase (b) a PDMAc<sub>58</sub>-PDAAm<sub>107</sub> worm/vesicle mixed phase (c) PDMAc<sub>58</sub>-PDAAm<sub>170</sub> vesicles (d) PDMAc<sub>40</sub>-PDAAm<sub>140</sub> vesicles (e) PDMAc<sub>40</sub>-PDAAm<sub>99</sub> worms. (f) TEM images obtained for a 0.1 % w/w aqueous PDMAc<sub>40</sub>-PDAAm<sub>99</sub> dispersion at pH 2.5 and pH 9.

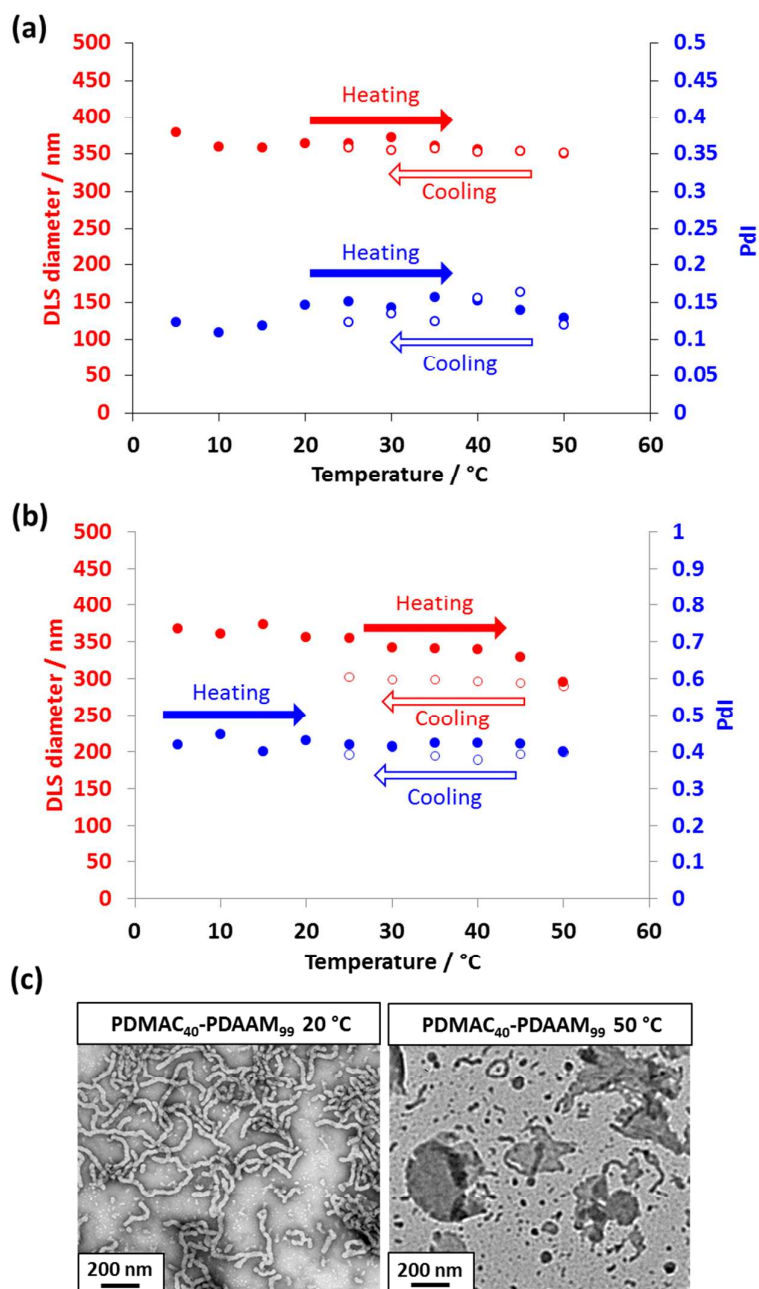

**Figure S4.** Variation of intensity-average hydrodynamic particle diameter and polydispersity (determined by DLS) with temperature on heating a 0.1% w/w aqueous dispersion of (a) PDMAc<sub>58</sub>-PDAAM<sub>170</sub> vesicles and (b) PDMAc<sub>40</sub>-PDAAM<sub>99</sub> worms from 4 °C to 50 °C followed by cooling from 50 °C to 25 °C at 5 °C intervals, allowing 15 min for thermal equilibrium at each temperature. (c) TEM images obtained for a 0.1 % w/w aqueous PDMAc<sub>40</sub>-PDAAM<sub>99</sub> dispersion at 20 °C and 50 °C.

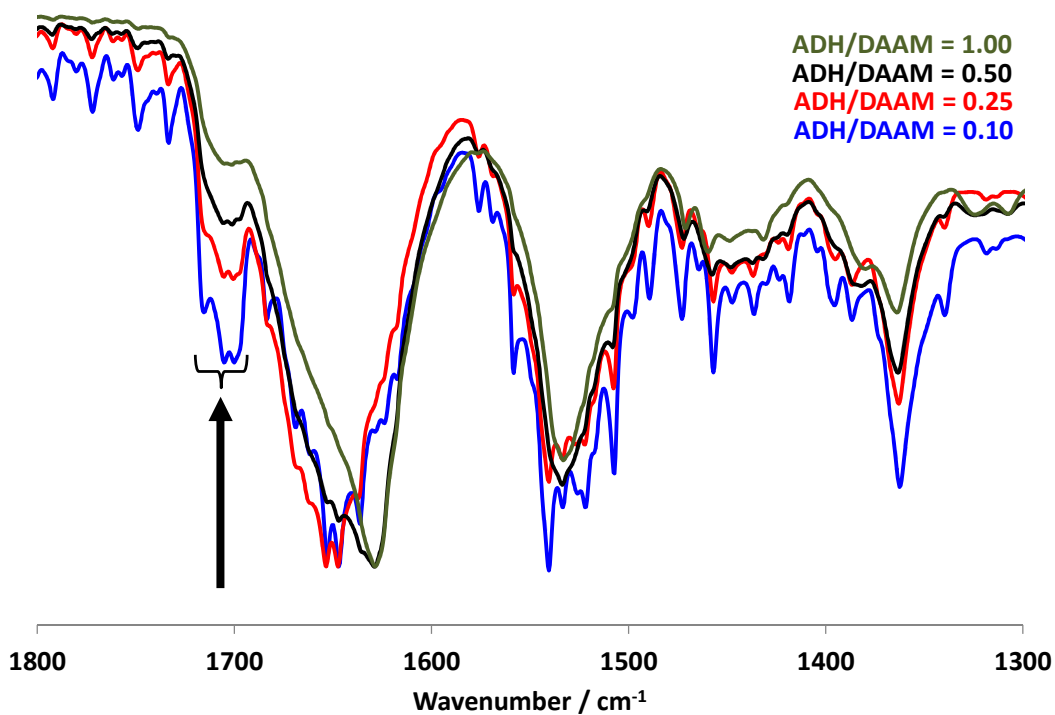

**Figure S5.** FT-IR spectra recorded for the freeze-dried copolymer products arising from the reaction of a 20 % w/w aqueous dispersion of PDMAC<sub>58</sub>-PDAAM<sub>230</sub> vesicles with ADH at 25 °C for 6 h using ADH/DAAM molar ratios of 1.00, 0.50, 0.25 or 0.10. The arrow indicates the carbonyl band assigned to the DAAM residues.

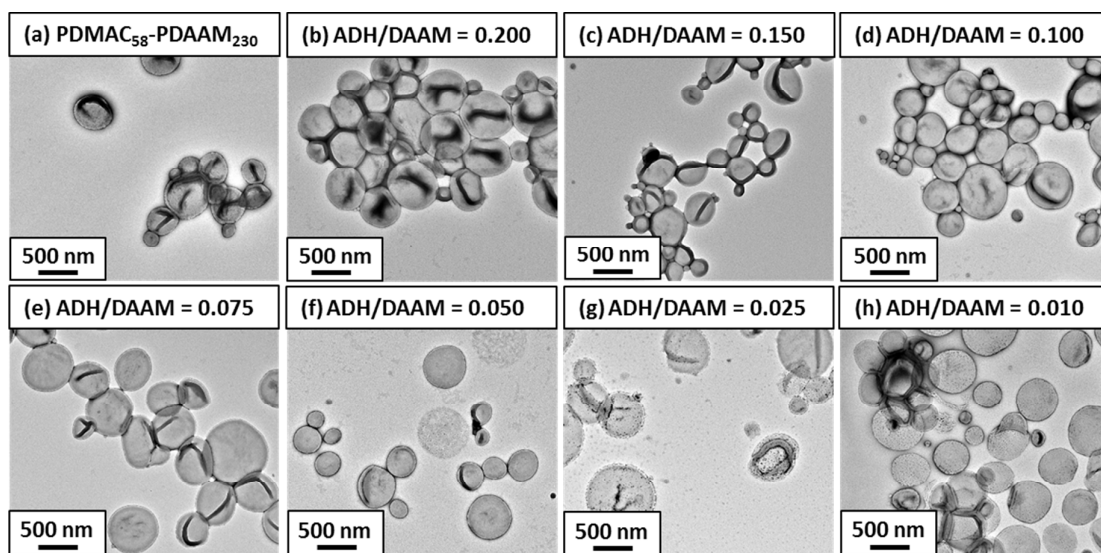

**Figure S6.** TEM images obtained for (a) a 0.1 % w/w *aqueous* dispersion of linear PDMAc<sub>58</sub>-PDAAM<sub>230</sub> vesicles at pH 2.5 and (b-h) a series of 0.1 % w/w *methanolic* dispersions of PDMAc<sub>58</sub>-PDAAM<sub>230</sub> vesicles crosslinked using ADH/DAAM molar ratios of 0.200, 0.150, 0.100, 0.075, 0.050, 0.025 or 0.010, respectively.
